# Supplementary material for: ProteinHistorian: Tools for the Comparative Analysis of Eukaryote Protein Origin
Source: PubMed Central journal article supplement (PMC3386163; doi:10.1371/journal.pcbi.1002567), 2012-06-28

Mann-Whitney U test:  $U = 1.4e+08$  ( $p = 0$ )

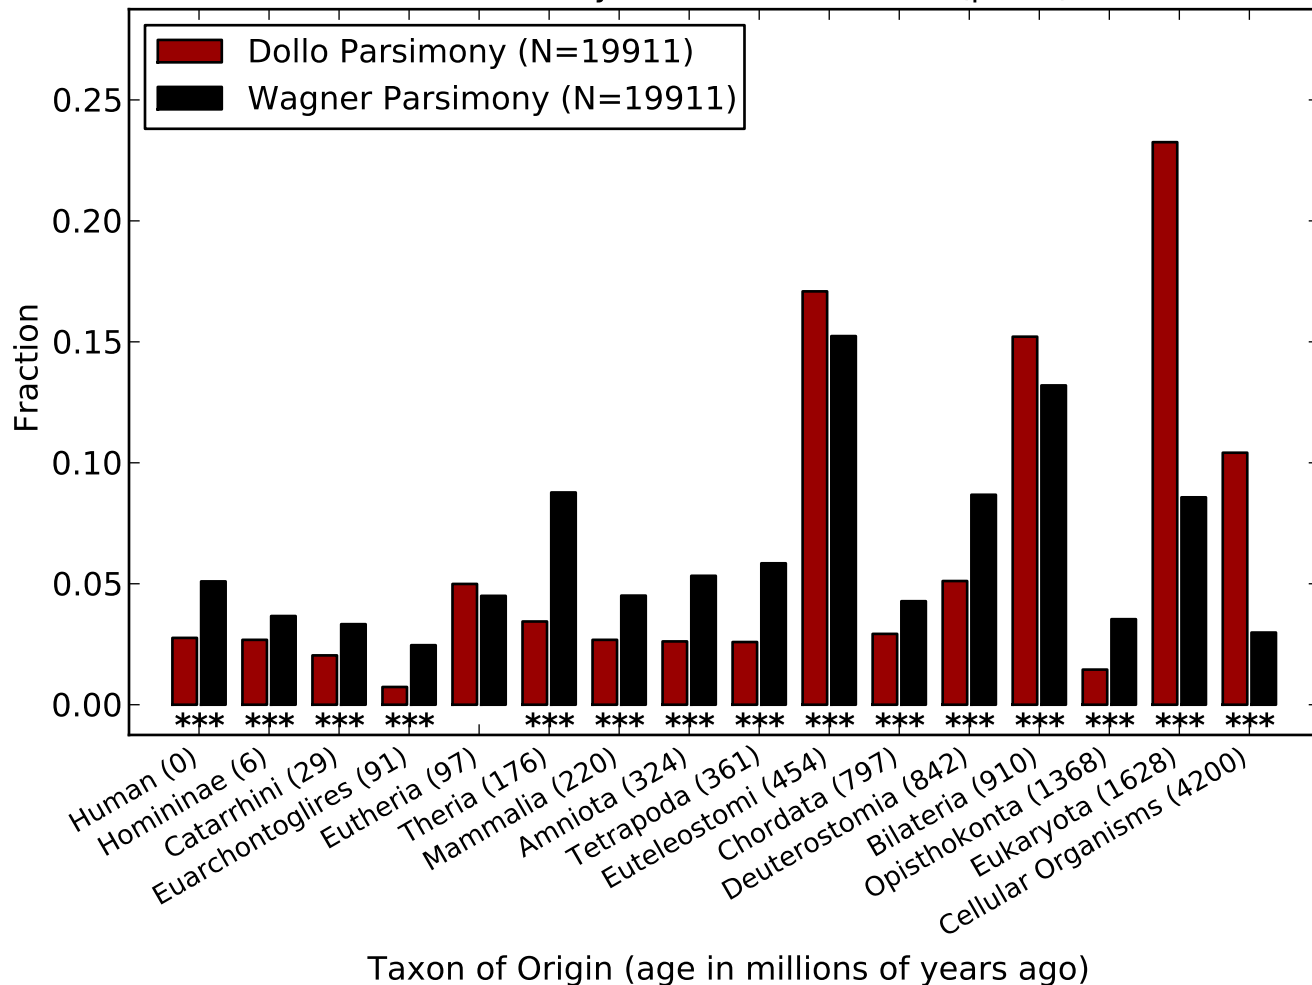

Supplement: pcbi.1002567.s002.pdf [file pcbi.1002567.s002.pdf]
