# Supplementary material for: ProteinHistorian: Tools for the Comparative Analysis of Eukaryote Protein Origin
Source: PubMed Central journal article supplement (PMC3386163; doi:10.1371/journal.pcbi.1002567), 2012-06-28

**A**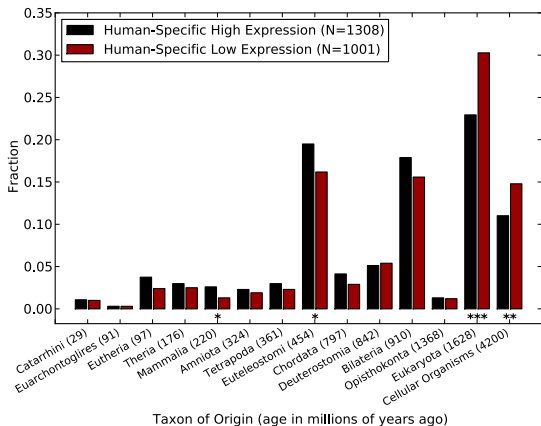**B**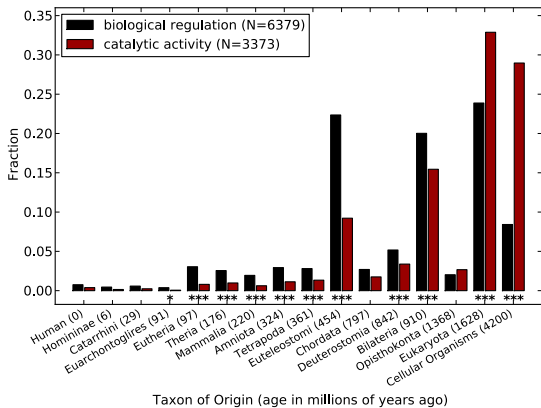

Supplement: pcbi.1002567.s005.pdf [file pcbi.1002567.s005.pdf]
