# Supplementary material for: ProteinHistorian: Tools for the Comparative Analysis of Eukaryote Protein Origin
Source: PubMed Central journal article supplement (PMC3386163; doi:10.1371/journal.pcbi.1002567), 2012-06-28

Spearman rho=0.165 (p=0.0), N=19910

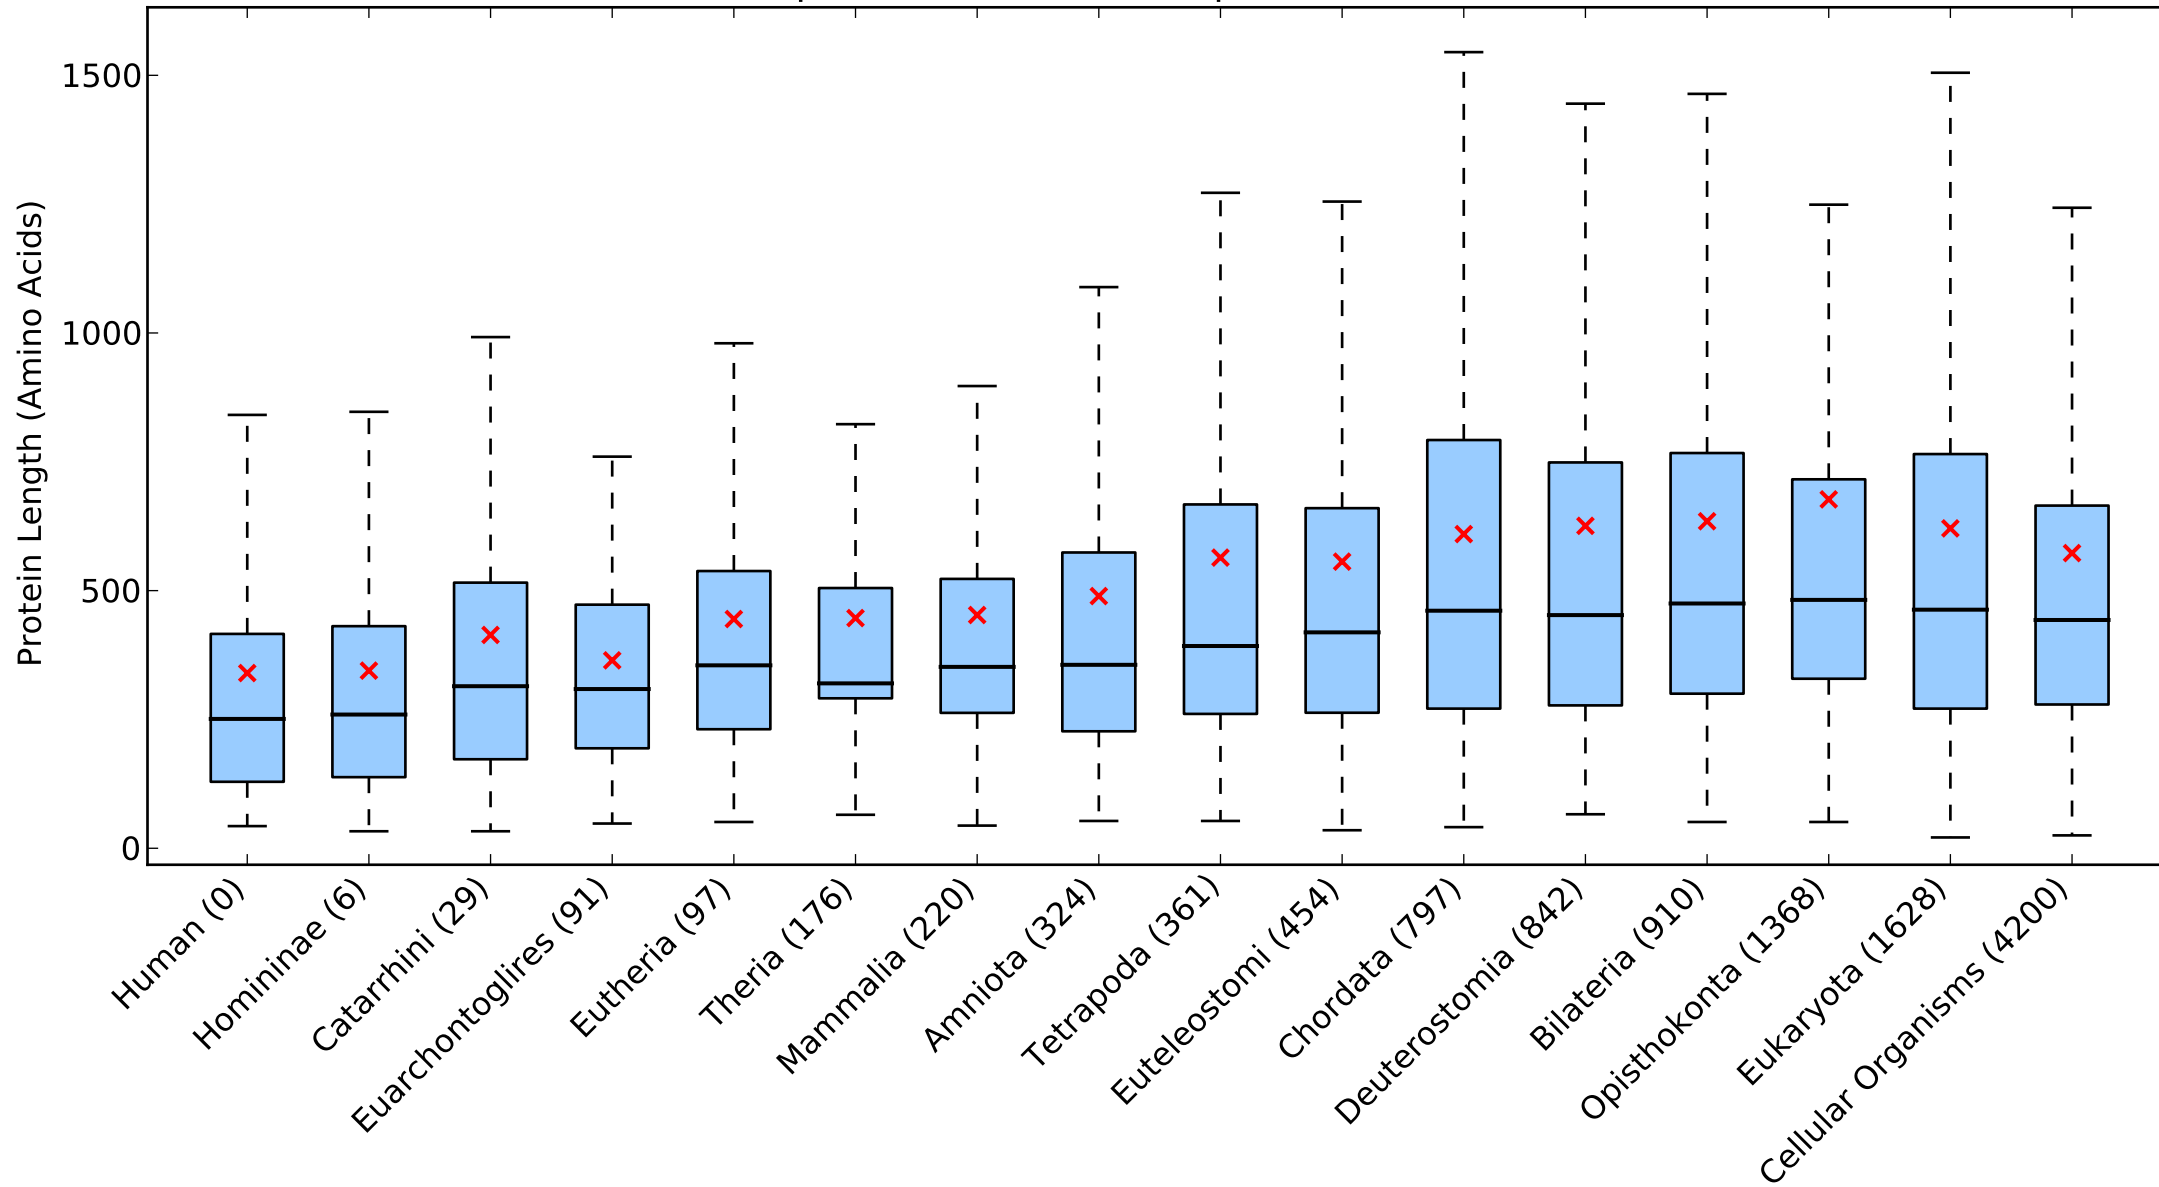

Supplement: pcbi.1002567.s006.pdf [file pcbi.1002567.s006.pdf]
